1 Title: Inhibitory interneurons show early dysfunction in a SOD1 mouse model of ALS

2 Abbreviated Title: Dysfunction of inhibitory interneurons in ALS

3 C. F. CAVARSAN<sup>1,2</sup>, P. R. STEELE<sup>1,2,3</sup>, L. M. McCANE<sup>3</sup>, K. J. LaPRE<sup>1,2</sup>, A. C. PURITZ<sup>4</sup>, N. KATENKA<sup>5</sup>,  
4 AND K. A. QUINLAN<sup>1,2,4</sup>

5 1 George and Anne Ryan Institute for Neuroscience, University of Rhode Island, Kingston, RI, 02881 USA

6 2 Department of Biomedical and Pharmaceutical Sciences, College of Pharmacy, University of Rhode Island,  
7 Kingston, RI, 02881 USA

8 3 Interdisciplinary Neuroscience Program, University of Rhode Island, Kingston, RI, 02881 USA

9 4 Department of Physiology, Northwestern University Feinberg School of Medicine, Chicago, IL, 60611 USA

10 5 Department of Computer Science and Statistics, University of Rhode Island, Kingston, RI, 02881 USA

11 Corresponding Author:

12 Katharina A. Quinlan

13 kaquinlan@uri.edu

14 George and Anne Ryan Institute for Neuroscience

15 University of Rhode Island

16 130 Flagg Rd

17 Kingston RI 02881

18 Number of pages: 30

19 Number of figures: 5

20 Number of tables: 4

21 Number of words in abstract: 150

22 Number of words in introduction: 619

23 Number of words in discussion: 1545

24

25 **Abstract:** Few studies in amyotrophic lateral sclerosis (ALS) focus on the premotor interneurons  
26 synapsing onto motoneurons (MNs). We hypothesized inhibitory interneurons contribute to  
27 dysfunction, particularly if altered before MN neuropathology. We directly assessed excitability and  
28 morphology of ventral lumbar glycinergic interneurons from SOD1<sup>G93A</sup>GlyT2eGFP (SOD1) and wildtype  
29 GlyT2eGFP (WT) mice. SOD1 interneurons were smaller but density was unchanged. Patch clamp  
30 revealed dampened excitability in SOD1 interneurons, including depolarized PICs and voltage threshold.  
31 Renshaw cells (RCs; confirmed with immunohistochemistry) showed similar dampened excitability.  
32 Morphology and electrophysiology were used to create a “random forest” statistical model to predict  
33 RCs when histological verification was not possible. Predicted SOD1 RCs were less excitable (consistent  
34 with experimental results); predicted SOD1 non-RCs were *more* excitable. In summary, inhibitory  
35 interneurons show very early perturbations poised to impact MNs, modify motor output, and provide  
36 early biomarkers of ALS. Therapeutics like riluzole that universally reduce CNS excitability could  
37 exacerbate this dysfunction.

38 **Key words:** inhibition, glycine, Renshaw cells, ALS, spinal cord, patch clamp, random forest

39

## 40 **Introduction**

41 Amyotrophic lateral sclerosis (ALS) is a rapidly evolving adult-onset neurological disease characterized by  
42 a progressive loss of corticospinal neurons and motoneurons (MNs). There has been considerable  
43 debate in the field over the role of hyperexcitability in neurodegenerative processes in ALS. While drug  
44 treatment for ALS based on nonspecific reduction of neuronal excitability (with riluzole, for example)  
45 (Bellingham 2011), does result in a modest increase in lifespan (Bensimon et al., 1994), similar  
46 treatment paradigms have been disappointing clinically. A more nuanced understanding of the  
47 excitability of vulnerable neurons could help in creating a more targeted and effective approach for  
48 treatment of ALS. For example, if inhibitory pathways are failing in ALS and neuronal excitability is  
49 universally reduced with riluzole, this could further exacerbate inhibitory dysfunction by reducing  
50 activity not only in vulnerable MNs but also in inhibitory interneurons presynaptic to MNs. Thus it is  
51 important to consider all aspects of neuronal excitability, including intrinsic excitability of vulnerable  
52 neurons, synaptic drive, and neuromodulation (Gunes et al., 2020). Intrinsic properties of MNs have  
53 been well studied but the same is not true for interneurons that are synaptically connected to them. In  
54 fact, no studies thus far have directly assessed activity of spinal premotor interneurons in an ALS model.  
55 Despite evidence that ALS patients have disrupted inhibition at spinal levels (Raynor and Shefner, 1994;  
56 Shefner and Logigian, 1998; Sangari et al., 2016; Howells et al., 2020), much is still unknown concerning  
57 the involvement of inhibitory circuitry in ALS. Morphological alterations in inhibitory circuits have been  
58 demonstrated in animal models of ALS. These include degeneration of spinal interneurons, fewer  
59 neurons expressing markers of inhibitory neurotransmitters including GlyT2 prior to loss of MNs (Martin  
60 et al., 2007; Hossaini et al., 2011), and loss of glycinergic boutons onto MNs prior to symptom onset  
61 (Chang and Martin, 2009a). Typically, fast motor neurons have greater numbers of inhibitory synaptic  
62 contacts, but these are largely lost in SOD1 mice beginning when motor unit atrophy is first observed  
63 (Pun et al., 2006; Hegedus et al., 2007; Allodi et al., 2020). Recurrent inhibitory circuits mediated by  
64 Renshaw cells (RCs) are impaired before symptom onset by both loss of MN collaterals which provide  
65 synaptic drive, and complex changes to RC-MN synaptic structures (Casas et al., 2013; Wootz et al.,  
66 2013). A few studies have suggested activity is decreased in inhibitory interneurons by indirect  
67 measurements. Quantification of synaptic inputs to MNs has shown that frequency of inhibitory  
68 postsynaptic potentials in spinal MNs is decreased embryonically in both SOD1 mouse and zebrafish  
69 models (McGown et al., 2013; Branchereau et al., 2019) and glycinergic inputs to MNs decay faster in  
70 SOD1 MNs (Medelin et al., 2016). On a larger scale, blocking the activity of V1 inhibitory interneurons  
71 during *in vivo* treadmill running was recently found to mimic the early locomotor deficits in SOD1 mice

72 (Allodi et al., 2020), suggesting that inhibitory interneurons could be inactive or under-active. However,  
73 none of these studies directly examined electrophysiological activity in inhibitory interneurons.  
74 We hypothesized that inhibitory spinal interneurons could contribute to the pathogenesis of ALS  
75 through a depression of MN inhibition. Decreased activity of inhibitory interneurons could result in  
76 synaptically-driven hyperexcitability of MNs, and other long-term changes in network function. In this  
77 study, we examined electrical and morphological properties of glycinergic interneurons in the spinal  
78 cord of SOD<sup>G93A</sup> GlyT2-eGFP (SOD1) mice compared to GlyT2-eGFP (WT) using whole cell patch clamp  
79 and three-dimensional reconstructions, immunohistochemistry for the RC marker calbindin (CBD), and  
80 statistical modeling. We show here that significant dysfunction is present in SOD1 glycinergic  
81 interneurons, including RCs and other subclasses of inhibitory interneurons. Impairment in glycinergic  
82 interneurons should be explored as both a mechanism of vulnerability of MNs and a potential biomarker  
83 of early dysfunction of spinal circuits.

## 84 **Results**

### 85 **Morphology of glycinergic interneurons**

86 Ventrally located glycinergic interneurons in the lumbar enlargement of WT and SOD1 mice postnatal  
87 day (P)6-10 were reconstructed from image stacks. There was no change in soma size and density of  
88 ventral glycinergic interneurons between WT and SOD1 mice when interneurons throughout the ventral  
89 horn were assessed. However, when we narrowed our examination to only those glycinergic  
90 interneurons located adjacent to MNs within lamina IX (most likely premotor interneurons), SOD1  
91 interneuron somata were smaller in several measures. Typical ventrolateral glycinergic neurons in the  
92 region of the MN pools in lamina IX are shown in the areas delimited with dotted lines in **Figure 1A**.  
93 Complete reconstructions of soma morphology were performed on 3902 GlyT2 interneurons (1918 WT  
94 and 1984 SOD1 interneurons) from fixed lumbar spinal cords (image stacks obtained using confocal  
95 microscopy) and 682 GlyT2 interneurons from only lamina IX (362 WT and 320 SOD1 interneurons).  
96 Reconstructions revealed that glycinergic interneurons in lamina IX were significantly smaller in every  
97 measurement of the soma (soma perimeter, largest cross-sectional area, soma surface area, and soma  
98 volume) (Fig 1B). Cell counts performed in the ventral lumbar spinal cord of 8 WT mice and 9 SOD1 mice  
99 showed no significant differences (Fig 1C). Dendritic morphology was not possible in these images due  
100 to the high number of GFP+ neurons and processes but was completed on a smaller subset of neurons  
101 that were imaged live after patch clamp electrophysiology with a 2-photon microscope.

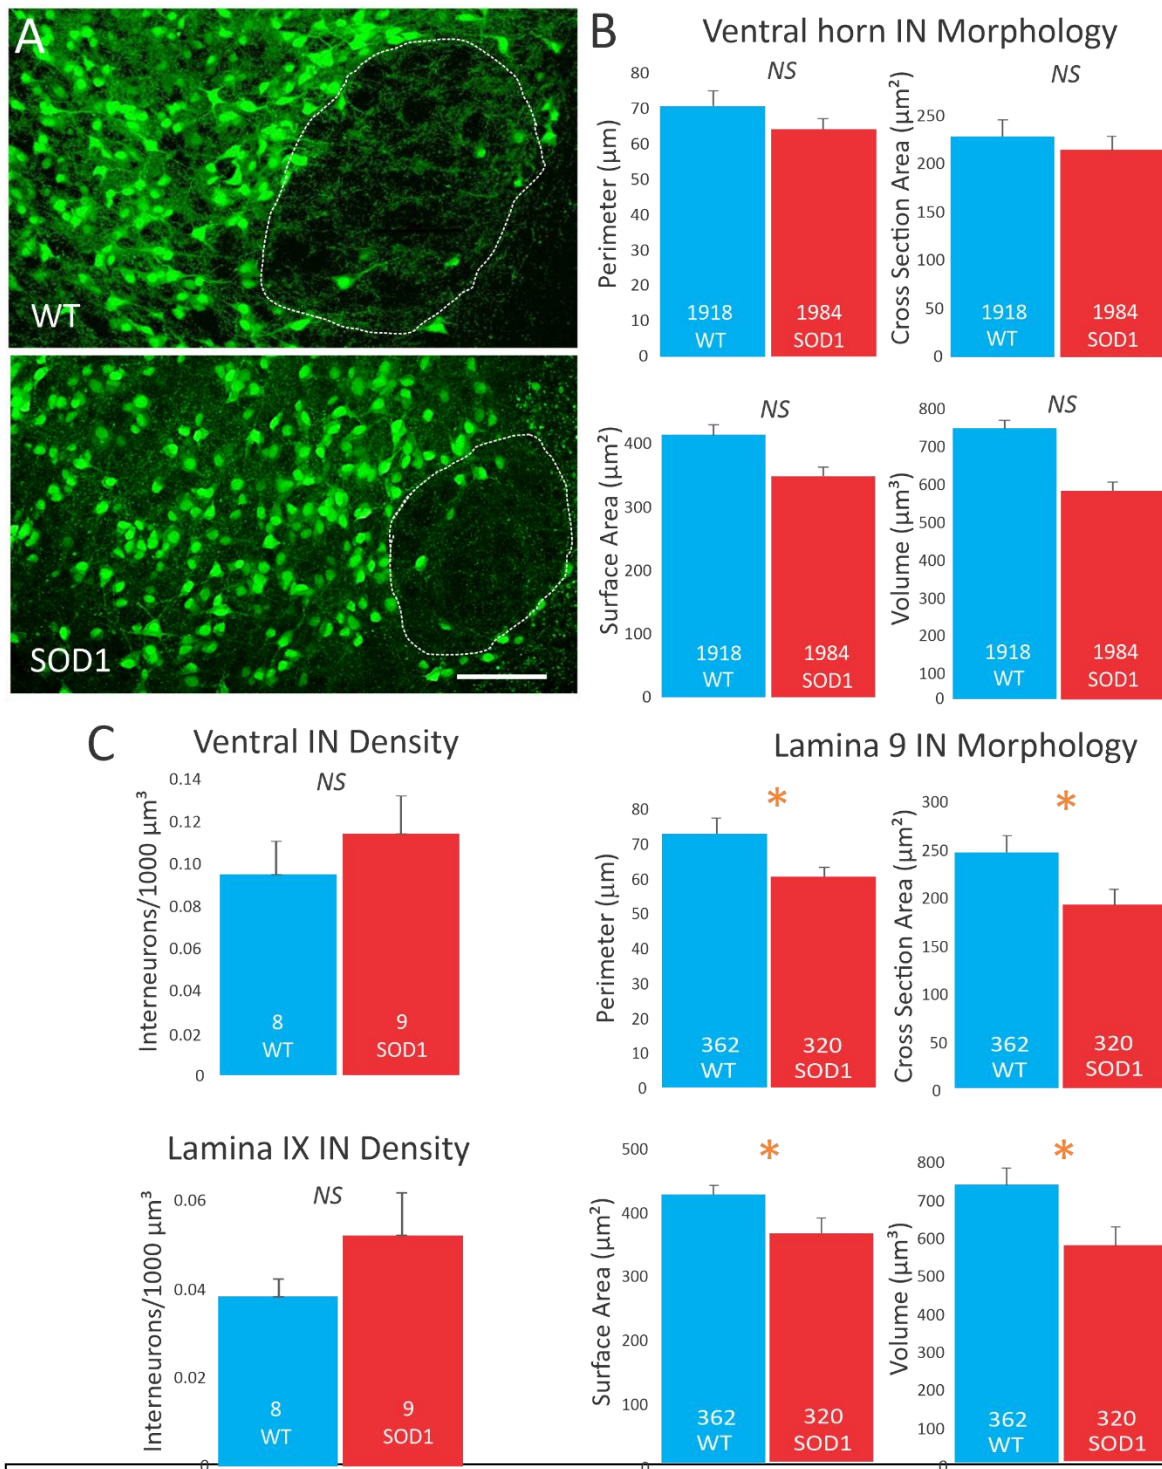

**Figure 1: GlyT2 interneurons in the ventral horn and lamina IX from WT and SOD1 mice were counted and morphologically analyzed.** Representative images of GFP interneurons in **A**, WT on the top and SOD1 on the bottom. Lamina IX delimited with dotted lines in images of ventral horns. **(B)** Morphological analysis showed no differences between glycinergic neurons in the ventral horn (top panels), but within lamina IX (bottom panels), SOD1 GlyT2 interneurons were smaller than WT in soma perimeter, soma largest cross-sectional area, soma surface and soma volume. **(C)** Density of GlyT2 interneurons were not significantly different between WT and SOD1 in the ventral horn or in lamina IX. Significance denoted with \* indicates  $p \leq 0.05$ . Scale bar in **A**: 100  $\mu\text{m}$ .

103 In these experiments, 59 glycinergic neurons (34 WT and 25 SOD1) were recorded using visually guided  
104 patch clamp with Texas Red dye in the electrode as shown in **Figure 2A**. The location of patched neurons  
105 was distributed throughout the ventral horn, not limited to lamina IX (Fig 2B). Thus, similar to the larger  
106 dataset above, soma sizes of patched SOD1 interneurons were not significantly smaller than WT (Fig 2C).  
107 However, dendrites were larger in patched SOD1 GlyT2 interneurons, including greater dendritic surface  
108 area and volume (see **Table 1** for complete results).

### 109 **Electrophysiology of glycinergic interneurons**

110 Whole cell patch clamp revealed very different intrinsic properties of ventral glycinergic interneurons.  
111 Recording was performed on 59 ventral interneurons from throughout the ventral horn (not limited to  
112 lamina IX) in transverse lumbar spinal cord slices from P6-10 mice. SOD1 inhibitory interneurons ( $n = 25$ )  
113 were found to have diminished intrinsic excitability compared to WT interneurons ( $n = 34$ ).  
114 Measurements of intrinsic excitability included depolarized onset and peak voltage of persistent inward  
115 currents (PICs) and depolarized threshold for action potential firing, as shown in **Figure 3**. In voltage  
116 clamp, slowly depolarizing voltage ramps were used to measure PICs (typical leak subtracted traces  
117 shown in Fig3A). Voltage sensitivity is determined by measuring voltage at PIC onset and peak. Both PIC  
118 onset and peak were significantly depolarized in SOD1 interneurons, indicating less intrinsic excitability.  
119 Amplitude of the PIC was unchanged. Depolarizing current ramps were used to measure the input-  
120 output relationship of the neurons in current clamp. Inhibitory interneurons from SOD1 mice were  
121 found to have significantly higher threshold voltage than control interneurons (Fig 3E-F). This shift is  
122 likely driven by the changes in PIC. The current at firing onset, or I-ON, was not significantly changed ( $p =$   
123  $0.15$ ), similar to the current at firing offset, or I-OFF ( $p = 0.07$ ). After-spike afterhyperpolarization (AHP)  
124 was also significantly different in SOD1 interneurons. The duration (at half AHP amplitude) was shorter  
125 in SOD1 neurons, as shown in Fig 3H-I. Amplitude of the AHP was unchanged. While changes in the PIC  
126 and threshold indicate less excitability in SOD1 interneurons, the shortened AHP suggests an increased  
127 ability to fire at higher rates in SOD1 interneurons, a property that is associated with increased  
128 excitability. However, no changes in firing rates were detected in SOD1 interneurons. All other  
129 properties were found to be similar in SOD1 and WT glycinergic interneurons, including maximum firing  
130 rates, sag/rebound currents ( $I_H$ ), action potential parameters and membrane properties (see **Table 2** for  
131 all electrical properties). See discussion for further interpretation of these findings.

132

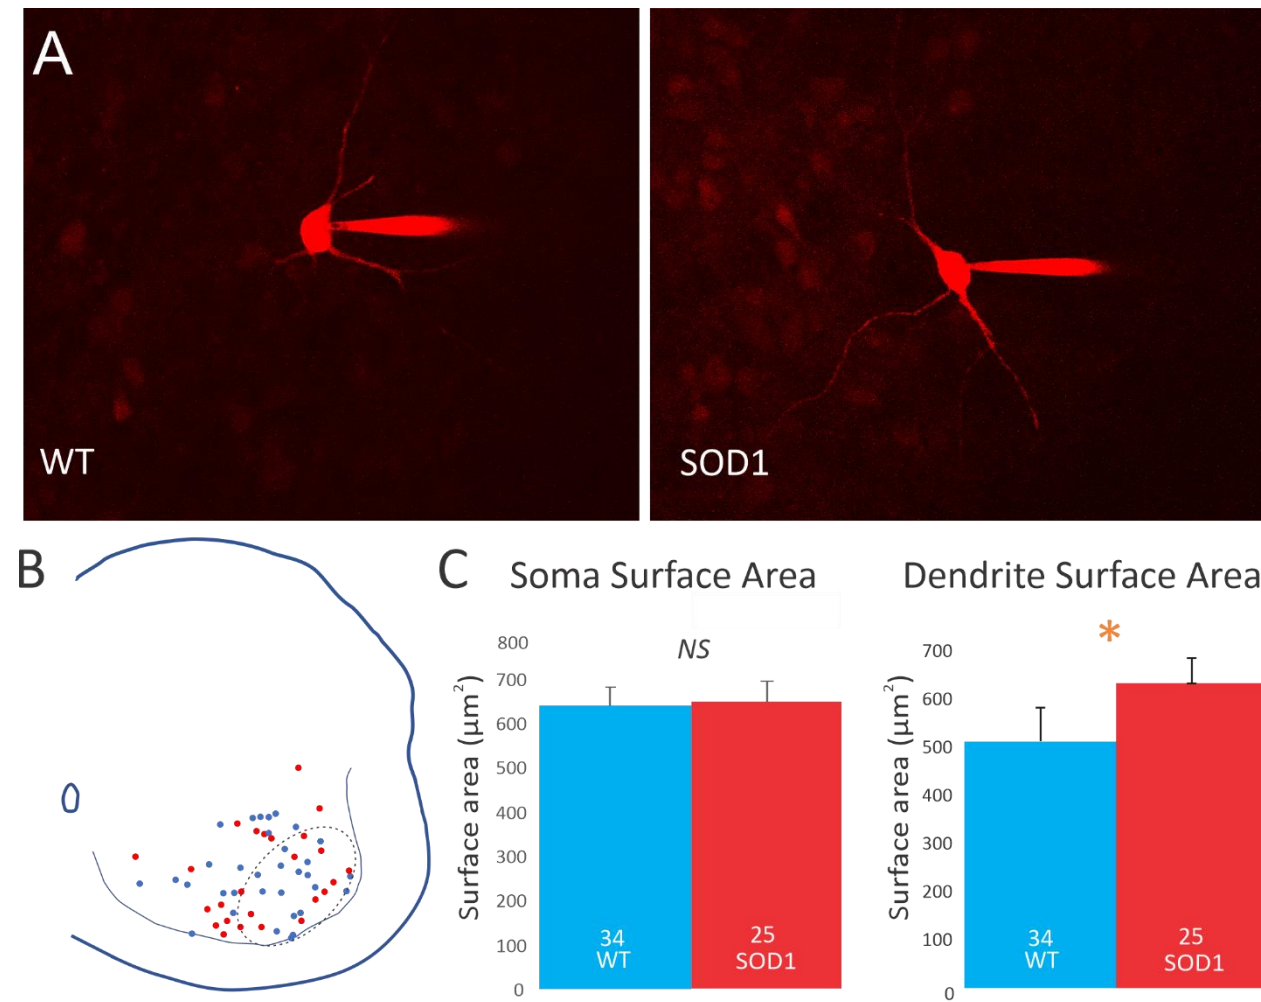

**Figure 2** GlyT2 interneurons from WT and SOD1 mice were patched throughout the ventral horn. Images of typical interneurons in **A**, and locations of all patched interneurons in **B** (WT = blue, SOD1 = red), with dotted line indicating area of lamina IX. **(C)** In patched interneurons, soma surface area was unchanged, while dendrite surface area was larger in SOD1 interneurons than in WT. Significance denoted with \* indicates  $p \leq 0.05$ .

134

135

136 **Table 1:** Reconstruction data of GlyT2-GFP+ interneurons in WT and SOD1 animals.

| <b>GlyT2-GFP+ Interneurons</b>         |                                         |                       |                        |                    |
|----------------------------------------|-----------------------------------------|-----------------------|------------------------|--------------------|
|                                        |                                         | <b>WT (Mean ± SE)</b> | <b>SOD (Mean ± SE)</b> | <b>p</b>           |
| <b>Ventral horn</b>                    |                                         | N = 1918              | N = 1984               |                    |
| <b>Soma</b>                            | Perimeter (μm)                          | 70.8 (± 4.4)          | 64.3 (± 2.5)           | 0.200              |
|                                        | Cross Sectional Area (μm <sup>2</sup> ) | 229.2 (± 17.3)        | 215.1 (± 14.4)         | 0.535              |
|                                        | Surface Area (μm <sup>2</sup> )         | 413.4 (± 21.7)        | 348.9 (± 22.8)         | 0.115 <sup>K</sup> |
|                                        | Volume (μm <sup>3</sup> )               | 714.0 (± 64.3)        | 552.1 (± 54.6)         | 0.115 <sup>K</sup> |
| <b>Lamina IX</b>                       |                                         | N = 362               | N = 320                |                    |
| <b>Soma</b>                            | Perimeter (μm)                          | 70.0 (± 4.4)          | 58.1 (± 2.5) *         | 0.034 <sup>K</sup> |
|                                        | Cross Sectional Area (μm <sup>2</sup> ) | 240.2 (± 17.0)        | 186.9 (± 15.9) *       | 0.031              |
|                                        | Surface Area (μm <sup>2</sup> )         | 421.7 (± 13.9)        | 358.2 (± 21.9) *       | 0.025              |
|                                        | Volume (μm <sup>3</sup> )               | 731.7 (± 44.1)        | 568.4 (± 49.5) *       | 0.022              |
| <b>Patched GlyT2-GFP+ Interneurons</b> |                                         |                       |                        |                    |
|                                        |                                         | N = 34                | N = 25                 |                    |
| <b>Soma</b>                            | Perimeter (μm)                          | 68.4 (± 3.4)          | 61.6 (± 3.0)           | 0.082              |
|                                        | Cross Sectional Area (μm <sup>2</sup> ) | 174.4 (± 13.4)        | 183.1 (± 16.9)         | 0.813 <sup>K</sup> |
|                                        | Surface Area (μm <sup>2</sup> )         | 637.5 (± 40.3)        | 644.3 (± 47.6)         | 0.903 <sup>K</sup> |
|                                        | Volume (μm <sup>3</sup> )               | 1472.4 (± 165.8)      | 1611.1 (± 188.9)       | 0.523 <sup>K</sup> |
| <b>Dendrites</b>                       | Length (μm)                             | 101.4 (± 17.3)        | 106.3 (± 10.0)         | 0.116 <sup>K</sup> |
|                                        | Surface Area (μm <sup>2</sup> )         | 512.7 (± 70.6)        | 633.6 (± 52.1) *       | 0.024 <sup>K</sup> |
|                                        | Volume (μm <sup>3</sup> )               | 264.7 (± 39.6)        | 375.3 (± 37.9) *       | 0.010 <sup>K</sup> |

137 Significance denoted with \* indicates  $p \leq 0.05$ .

138 <sup>K</sup> Indicates Kruskal Wallis analysis for non-normal distributions; all others were ANOVA analysis.

139

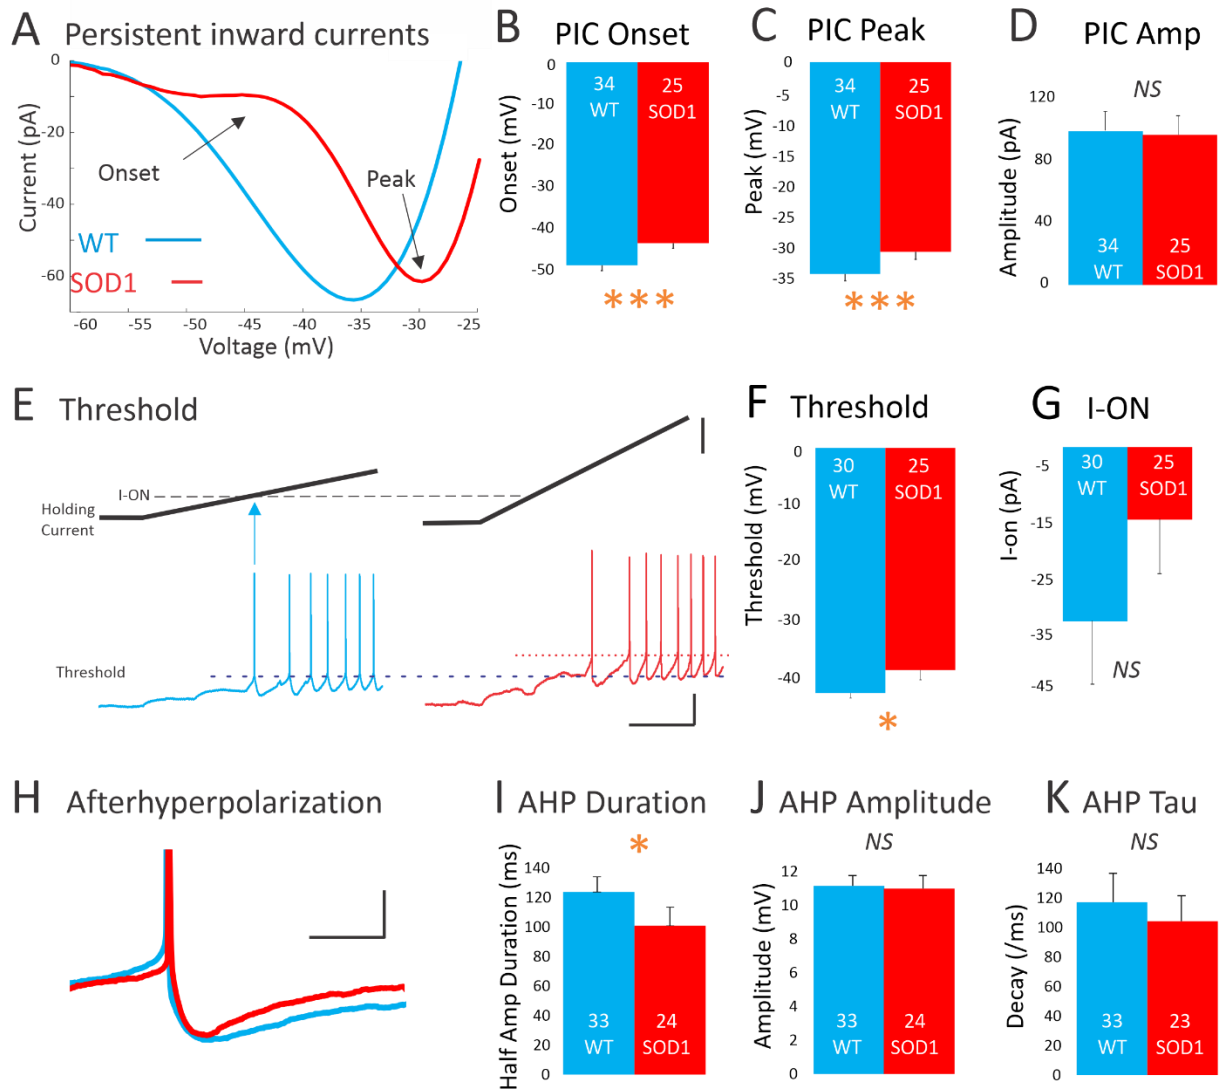

140

**Figure 3: Electrophysiology of SOD1 glycinergic interneurons.** The most prominent difference in SOD1 interneurons was the shift in voltage dependence of PICs. **(A)** Representative, leak-subtracted current-voltage relationship of PICs from WT (P8) and SOD1 (P6) interneurons; arrows indicate voltage at PIC onset and voltage at PIC peak. **(B-D)** Mean onset, peak and amplitude of PICs in WT and SOD1 interneurons. **(E-F)** Threshold voltage (as measured by current ramps as shown) was depolarized in SOD1 interneurons. Starting potential for both interneurons was -65mV. The current at firing onset (I-ON) was not significantly different as shown in **G**. **(H)** The AHP in SOD1 interneurons was shorter, as shown by the smaller mean duration at half amplitude in a representative P8 WT and P7 SOD1 interneuron in **I**. Neither the AHP amplitude nor the AHP decay time constant, tau, were significantly altered in SOD1 glycinergic interneurons as shown in **J-K**. Vertical scale bars in **E**: top = 50pA, and bottom = 20mV. Horizontal scale bar in **E** = 0.5s and all scale bars apply to both left and right panels. Vertical scale bar in **H** = 10mV (APs were truncated from image), and horizontal scale bar = 50ms. Significance denoted with \* indicates  $p \leq 0.05$ .

141

142



143 **Table 2:** Electrophysiological properties of GlyT2-GFP+ interneurons in WT and SOD1 animals.

| Parameters                              | Groups         |                 | <i>p</i>           |
|-----------------------------------------|----------------|-----------------|--------------------|
|                                         | WT (Mean ± SE) | SOD (Mean ± SE) |                    |
|                                         | <i>N</i> = 34  | <i>N</i> = 25   |                    |
| Resting membrane potential (mV)         | -46.7 ± 1.1    | -45.7 ± 1.4     | 0.524 <sup>K</sup> |
| Capacitance (pF)                        | 66 ± 7         | 55 ± 5          | 0.529 <sup>K</sup> |
| Input resistance (MΩ)                   | 295 ± 32       | 299 ± 41        | 0.794 <sup>K</sup> |
| <b>PIC properties</b>                   |                |                 |                    |
| PIC onset (mV)                          | -50.5 ± 1.0    | -46.3 ± 1.0*    | 0.004              |
| PIC peak (mV)                           | -35.1 ± 0.8    | -31.2 ± 0.9*    | 0.003              |
| PIC amplitude (pA)                      | 100 ± 13       | 97 ± 12         | 0.890 <sup>K</sup> |
| Normalized PIC (pA/pF)                  | 1.79 ± 0.24    | 1.92 ± 0.22     | 0.226 <sup>K</sup> |
| <b>Firing properties</b>                |                |                 |                    |
| Inst max firing freq range max (Hz)     | 112 ± 8        | 113 ± 8         | 0.961              |
| Inst max firing freq range min (Hz)     | 55 ± 3         | 63 ± 7          | 0.442 <sup>K</sup> |
| Steady state firing freq range max (Hz) | 36 ± 2         | 40 ± 3          | 0.355 <sup>K</sup> |
| Steady state firing freq range min (Hz) | 6 ± 0.4        | 6 ± 0.7         | 0.453 <sup>K</sup> |
| I-ON (pA)                               | -33 ± 12       | -14 ± 11        | 0.148 <sup>K</sup> |
| I-OFF (pA)                              | 5 ± 9          | 36 ± 14         | 0.074 <sup>K</sup> |
| Δ I (pA)                                | 38 ± 8         | 50 ± 10         | 0.331 <sup>K</sup> |
| <b>AP properties</b>                    |                |                 |                    |
| AP overshoot past 0 (mV)                | 20.0 ± 1.7     | 21.4 ± 1.6      | 0.553              |
| AP duration at half peak (ms)           | 1.53 ± 0.10    | 1.48 ± 0.08     | 0.944              |
| AP rate of rise (V/s)                   | 87 ± 5         | 83 ± 3          | 0.428 <sup>K</sup> |
| AP rate of fall (V/s)                   | 45 ± 3         | 43 ± 2          | 0.924 <sup>K</sup> |
| Threshold on ramp (mV)                  | -40.6 ± 0.8    | -37.9 ± 1.1*    | 0.052 <sup>K</sup> |
| Threshold on step (mV)                  | -47.3 ± 0.8    | -45.1 ± 1.3     | 0.199 <sup>K</sup> |
| <b>AHP properties</b>                   |                |                 |                    |
| AHP amplitude (mV)                      | 11.2 ± 0.6     | 11.0 ± 0.8      | 0.704 <sup>K</sup> |
| AHP duration at half amplitude (s)      | 0.12 ± 0.01    | 0.10 ± 0.01*    | 0.045 <sup>K</sup> |
| AHP tau (s <sup>-1</sup> )              | 0.12 ± 0.02    | 0.10 ± 0.02     | 0.980 <sup>K</sup> |
| <b>I<sub>H</sub> properties</b>         |                |                 |                    |
| Hyperpolarizing Sag (%)                 | 32 ± 3         | 32 ± 4          | 0.537 <sup>K</sup> |
| Depolarizing Rebound (%)                | 17 ± 3         | 19 ± 5          | 0.536 <sup>K</sup> |

144 Significance denoted with \* indicates  $p \leq 0.05$ .

145 <sup>K</sup> Indicates Kruskal Wallis analysis for non-normal distributions; all others were ANOVA analysis.

146

147 **Renshaw cells: electrophysiology and morphology**

148 Glycinergic interneurons in the ventral spinal cord are not a homogenous population and we sought to  
149 determine more specifically what subtype of ventral inhibitory interneurons were morphologically and  
150 electrophysiologically altered in SOD1 mice. Since we recorded glycinergic interneurons in the region of  
151 lamina IX, we expected our population to include RCs. To distinguish them, we performed  
152 immunohistochemistry for the RC marker CBD on GlyT2 neurons labeled with dye during recording (see  
153 **Figure 4A**). We also examined density of RCs in lamina IX of the spinal cords, which was unchanged  
154 between WT (N = 8 mice) and SOD1 (N = 7 mice; Figure 4B). Similar to the results above for all GlyT2  
155 interneurons, electrophysiological parameters of SOD1 RCs were very different compared to WT (7 WT  
156 and 6 SOD interneurons). The voltage dependence of the PIC (both onset and peak) was significantly  
157 depolarized in SOD1 RCs, indicating they are less excitable. Threshold voltage was also significantly  
158 higher in SOD1 RCs when measured from step protocols, though it was not significant when measured  
159 from current ramp protocols (Figure 4C). All RC electrophysiological properties are included in **Table 3**.

160

161

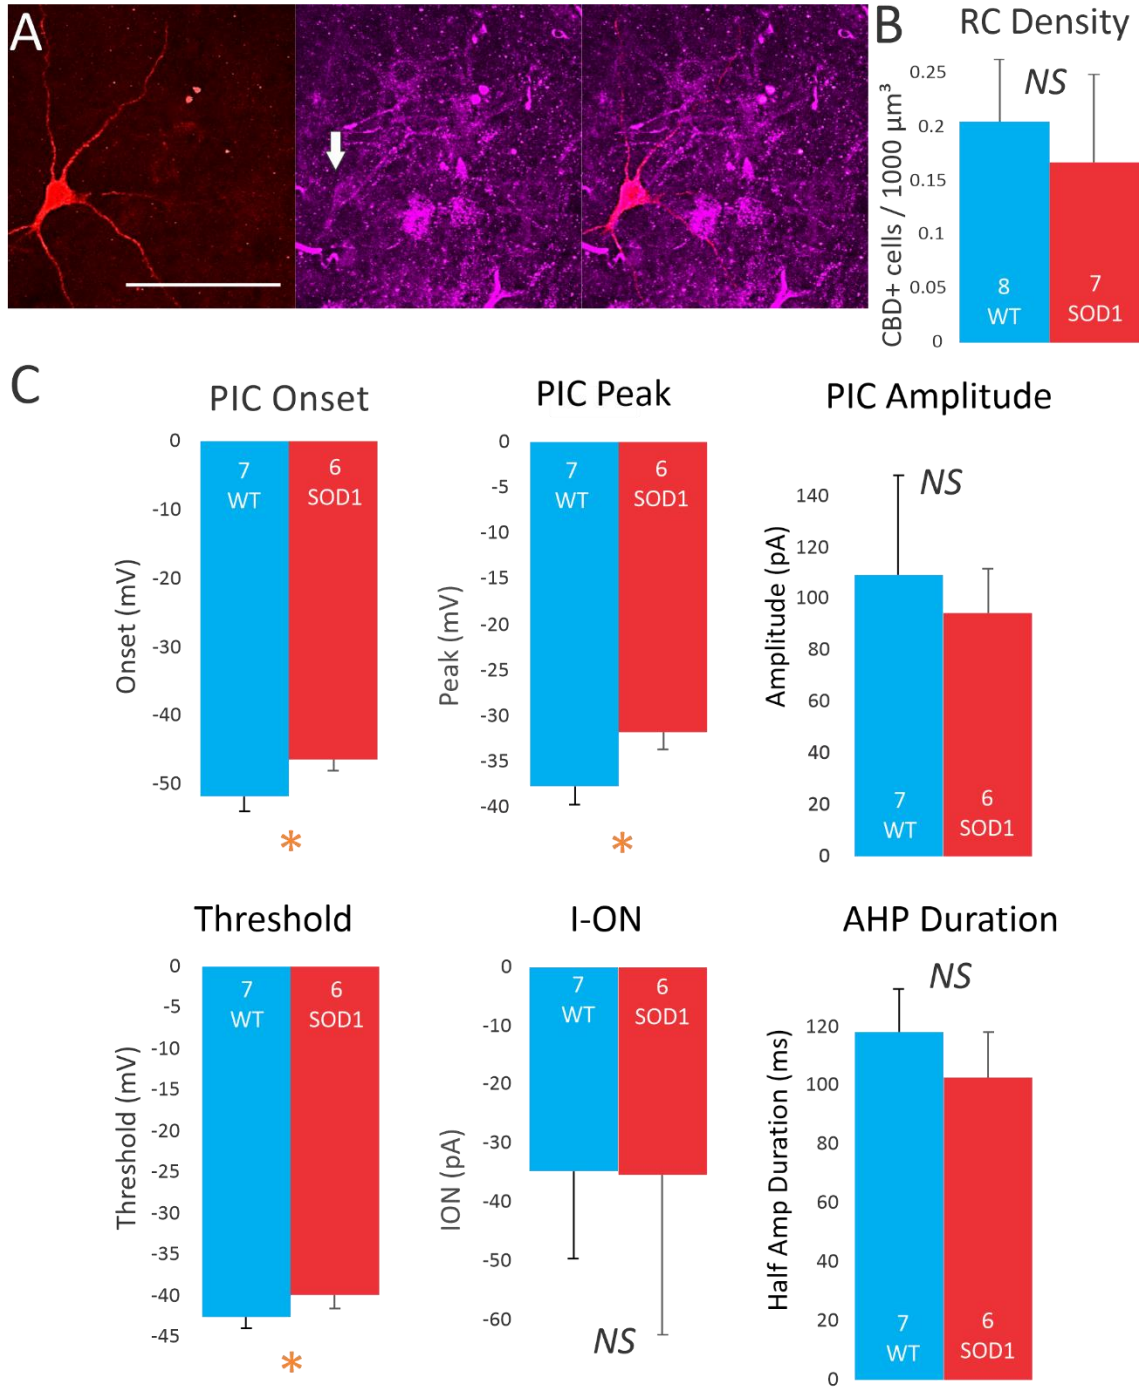

**Figure 4: Renshaw cell (RC) density and electrophysiology.** (A) Image of an interneuron which was patched and filled with Texas Red (left panel), and immunoreactive for CBD (middle panel); overlay provided in right panel. The RC is indicated by a white arrow in middle panel. (B) No differences were found in the density of CBD+ cells in lamina IX of WT and SOD1 mice. (C) Several electrophysiological parameters were measured from the cells. PIC onset, PIC peak and voltage threshold showed higher values in RCs from SOD1 animals, compared to WT RCs. There were no significant differences between groups in PIC amplitude, I-on and AHP duration. Significance denoted with \* indicates  $p \leq 0.05$ . Scale bar in A: 100  $\mu\text{m}$ .

163 **Table 3:** Electrophysiological properties of Renshaw cells, in both groups, WT and SOD1.

| Parameters                              | Groups                  |                          | <i>p</i>           |
|-----------------------------------------|-------------------------|--------------------------|--------------------|
|                                         | WT (Mean ± SE)<br>N = 7 | SOD (Mean ± SE)<br>N = 6 |                    |
| <b>PIC properties</b>                   |                         |                          |                    |
| PIC onset (mV)                          | -53.7 ± 2.5             | -46.3 ± 1.9*             | 0.040              |
| PIC peak (mV)                           | -39.4 ± 2.2             | -31.8 ± 2.0*             | 0.027              |
| PIC amplitude (pA)                      | 109.4 ± 41.6            | 94.6 ± 18.7              | 0.775 <sup>K</sup> |
| Normalized PIC (pA/pF)                  | 1.76 ± 0.41             | 2.13 ± 0.47              | 0.475 <sup>K</sup> |
| <b>Firing properties</b>                |                         |                          |                    |
| Inst max firing freq range max (Hz)     | 120.8 ± 24.9            | 122.3 ± 17.4             | 0.962              |
| Inst max firing freq range min (Hz)     | 55.8 ± 9.2              | 62.0 ± 7.1               | 0.608              |
| Steady state firing freq range max (Hz) | 43.0 ± 8.1              | 43.7 ± 7.6               | 0.954              |
| Steady state firing freq range min (Hz) | 4.8 ± 0.5               | 7.8 ± 1.7                | 0.097              |
| I-ON (pA)                               | -34.8 ± 15.9            | -35.1 ± 29.7             | 0.985              |
| I-OFF (pA)                              | 7.9 ± 20.8              | 12.6 ± 37.7              | 0.475 <sup>K</sup> |
| Δ I (pA)                                | 42.7 ± 14.9             | 48.0 ± 16.1              | 0.567 <sup>K</sup> |
| <b>AP properties</b>                    |                         |                          |                    |
| AP overshoot past 0 (mV)                | 21.3 ± 4.0              | 23.9 ± 4.1               | 0.661              |
| AP duration at half peak (ms)           | 1.2 ± 0.1               | 1.4 ± 0.1                | 0.452              |
| AP rate of rise (V/s)                   | 99.1 ± 5.7              | 94.1 ± 4.0               | 0.501              |
| AP rate of fall (V/s)                   | 54.2 ± 5.7              | 47.5 ± 3.6               | 0.359              |
| Threshold on ramp (mV)                  | -42.6 ± 1.4             | -39.8 ± 1.9              | 0.262              |
| Threshold on step (mV)                  | -48.7 ± 1.1             | -45.0 ± 1.0*             | 0.032              |
| <b>AHP properties</b>                   |                         |                          |                    |
| AHP amplitude (mV)                      | 12.6 ± 1.1              | 11.2 ± 1.7               | 0.481              |
| AHP duration at half amplitude (s)      | 0.118 ± 0.016           | 0.103 ± 0.017            | 0.516              |
| AHP tau (s <sup>-1</sup> )              | 0.103 ± 0.022           | 0.082 ± 0.014            | 1.000 <sup>K</sup> |
| <b>I<sub>H</sub> properties</b>         |                         |                          |                    |
| Hyperpolarizing Sag (%)                 | 35.3 ± 6.7              | 44.8 ± 11.5              | 0.471              |
| Depolarizing Rebound (%)                | 19.1 ± 4.1              | 30.1 ± 17.4              | 0.568 <sup>K</sup> |

164

165 Significance denoted with \* indicates  $p \leq 0.05$ .

166 <sup>K</sup> Indicates Kruskal Wallis analysis for non-normal distributions; all others were ANOVA analysis.

167

## 168 **Predictive statistical modeling**

169 Since it was not possible to identify all recorded GlyT2 neurons as RCs or non-RCs using  
170 immunohistochemistry, we performed predictive statistical modeling. We created a series of statistical  
171 models using random forest and principal components analysis (see methods for more details on  
172 creation of the models). All variables, including morphology and electrical properties, were grouped into  
173 8 categories of related variables. For example, all variables pertaining to dendritic morphology were  
174 grouped into a single category. Importance of each variable was determined by the decrease in accuracy  
175 of the model when variables were removed. The variables that were used by the random forest model  
176 are listed in **Table 4** in descending order of importance. Variables with large positive values were crucial  
177 for the model's accuracy in predicting RC vs non-RCs, while variables that have negative values proved  
178 detrimental to the predictive value of the model. For comparison, the grouping that provided the best  
179 prediction of CBD-tested neurons using PCA were action potential features (LOOCV accuracy 70%, AIC  
180 =28,  $p=0.11$  and  $0.08$ , PC1 and PC2, respectively). Variables in this grouping that had effect sizes  $\geq 0.5$   
181 were I-off, AP threshold, AP rise and AP fall. The most accurate random forest model correctly predicted  
182 the identity of the CBD-tested interneurons with 79% accuracy; thus we used this model to predict RCs  
183 and non-RCs in all recorded GlyT2+ interneurons in which RC identification using immunohistochemistry  
184 was not possible. The model predicted that 80% of our 59 patched interneurons were RCs. This  
185 percentage is greater than that measured from our immunohistochemistry results: 65% of our patched  
186 interneurons (15/23) were positive for CBD. Predicted RCs were then analyzed as a group for  
187 differences between WT and SOD interneurons, while predicted non-RCs were analyzed separately. We  
188 found that in predicted RCs, there was a depression of excitability very consistent with our experimental  
189 data. The predicted RC grouping had significant depolarization of the PIC and significantly depolarized  
190 threshold. PIC parameters of the predicted groups are shown in **Figure 5**. Interestingly, in predicted non-  
191 RCs excitability increased. Both the PIC amplitude and the PIC normalized to capacitance were larger in  
192 the group of predicted non-RCs from SOD1 mice. Further studies will be needed to investigate more fully  
193 the properties of different subtypes of non-RC glycinergic interneurons in this and other ALS models at  
194 this and other time points in the lead up to MN dysfunction and degeneration.

195

196

197 **Table 4:** Variables used to create the random forest predictive model. Variables are arranged in  
198 descending order of importance for prediction of RCs and non-RCs, based on the mean decrease in  
199 accuracy test.

200

| Variable                                   | Mean Decrease in Accuracy |
|--------------------------------------------|---------------------------|
| Dendrite Mean Length ( $\mu\text{m}$ )     | 8.27508593                |
| Cell Body Surface Area ( $\mu\text{m}^2$ ) | 3.98158541                |
| Capacitance (pF)                           | 3.82644995                |
| AHP tau ( $\text{s}^{-1}$ )                | 3.42103087                |
| Cell Body Length ( $\mu\text{m}$ )         | 2.97501036                |
| Perimeter ( $\mu\text{m}$ )                | 2.15259564                |
| Dendrite Surface Area ( $\mu\text{m}^2$ )  | 1.58220831                |
| Cell Body Volume ( $\mu\text{m}^3$ )       | 1.30757721                |
| Cell Body Surface Area ( $\mu\text{m}^2$ ) | 1.17777719                |
| V threshold (mV)                           | 0.99130144                |
| Cell Body Area ( $\mu\text{m}^2$ )         | 0.89067177                |
| AP size (mV)                               | 0.59738713                |
| Enclosed Volume ( $\mu\text{m}^3$ )        | 0.57054623                |
| Steady state firing freq max (Hz)          | 0.28434868                |
| I-ON (pA)                                  | 0.13715380                |
| $I_H$ Sag (mV)                             | -0.06241806               |
| Dendrite Volume ( $\mu\text{m}^3$ )        | -0.41041638               |
| Dendrite Length ( $\mu\text{m}$ )          | -0.91989565               |
| Instantaneous max firing rate (Hz)         | -0.96322954               |
| Inst max firing freq range max (Hz)        | -1.40411698               |
| AP overshoot (mV)                          | -1.53244473               |
| $I_H$ Rebound (mV)                         | -1.95402459               |

201

202

203

204

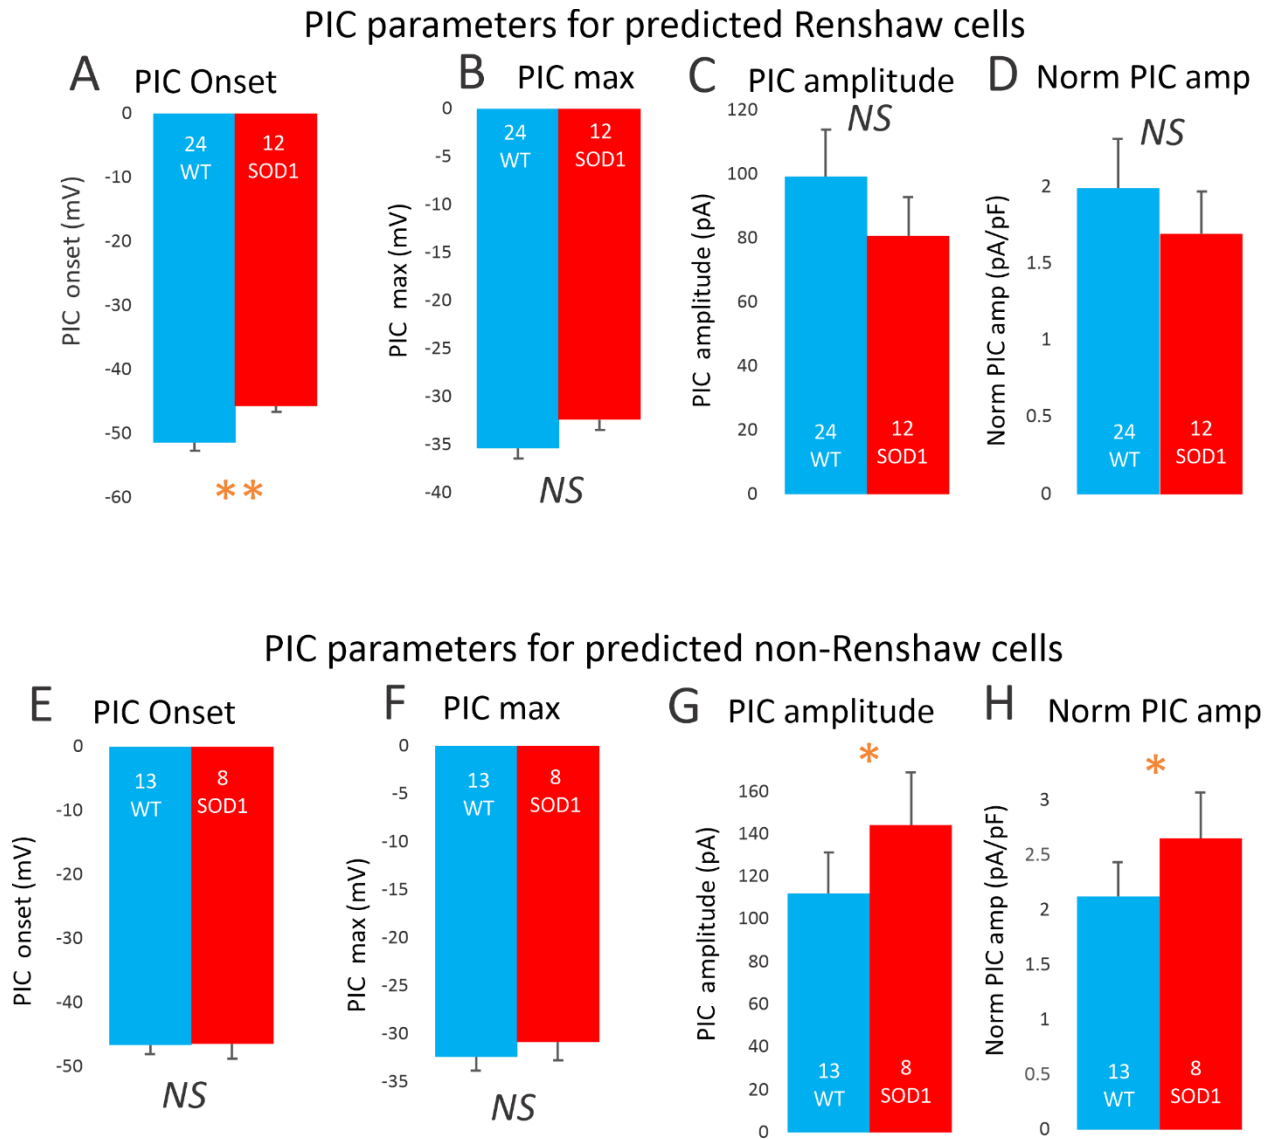

**Figure 5** Genotype is predicted to have opposite effects on predicted RCs and non-RCs. **A – D** Predicted RCs have depolarized PIC onset, similar to overall experimental results. This is accompanied by depolarized threshold (data not shown). **E – H** Predicted non-RC glycinergic interneurons have larger PIC amplitudes, including larger normalized PIC amplitudes. \* Significance denoted with \* indicates  $p \leq 0.05$ .

205

206

207

208 **Discussion**

209 This study shows for the first time that RC are depressed in excitability and glycinergic interneurons may  
210 be contributing to ALS pathology. Alterations in both morphology and excitability of glycinergic  
211 interneurons occurs at a very early stage. RCs are depressed in activity and lamina IX interneurons are  
212 smaller in SOD1 mice. Based on our statistical modeling, we predict the remaining non-RC inhibitory  
213 interneurons have increased excitability, including larger PICs. We speculate that these shifts in  
214 interneuron excitability could alter the excitability of postsynaptic MNs, modify motor output, and  
215 provide an early biomarker of ALS.

216 *Intrinsic and synaptic hyperexcitability*

217 A core issue this study brings to light is potential long-term disruption to the balance of excitatory and  
218 inhibitory synaptic transmission in ALS. Spinal cord and cortex both show imbalance between excitatory  
219 and inhibitory synaptic transmission in SOD<sup>G93A</sup> mice (Avossa et al., 2006; Saba et al., 2016). Clinically,  
220 ALS patients show evidence of altered synaptic activity as well, including a reduction in inhibition. A  
221 reduction of glycinergic receptor binding in the anterior gray matter of the spinal cord (Hayashi et al.,  
222 1981; Whitehouse et al., 1983) has been demonstrated along with abnormal glycine and gamma amino  
223 butyric acid (GABA) levels in blood serum (Malessa et al., 1991; Niebroj-Dobosz and Janik, 1999).  
224 Electrophysiology also suggests disruption in spinal inhibitory circuits in ALS patients (Raynor and  
225 Shefner, 1994; Shefner and Logigian, 1998; Sangari et al., 2016). An interesting question is whether the  
226 neurons are altered in excitability only within the motor circuit (i.e. corticospinal neurons and the  
227 synaptically-connected spinal inhibitory and cholinergic interneurons, and MNs), or if disturbances are  
228 more widespread throughout the nervous system. In the spinal cord, interneurons that serve as conduits  
229 between vulnerable corticospinal and spinal MNs include cholinergic interneurons, Ia inhibitory  
230 interneurons and RCs. There is abundant evidence of disruption in these cholinergic, GABAergic and  
231 glycinergic synapses from animal models (Martin et al., 2007; Chang and Martin, 2009b; Pullen and  
232 Athanasiou, 2009; Hossaini et al., 2011; Herron and Miles, 2012; Casas et al., 2013; Wootz et al., 2013;  
233 Saxena et al., 2013; Milan et al., 2015; Dukkipati et al., 2016; Medelin et al., 2016). Similarly, in the  
234 cortex, neurons that are not themselves vulnerable to neurodegeneration in ALS also exhibit altered  
235 excitability and morphology in a parallel time course to the vulnerable corticospinal neurons (Clark et al.,  
236 2017, 2018; Kim et al., 2017). The changes in excitability of other neuronal populations must contribute  
237 to the imbalance of both excitatory and inhibitory neurotransmission that has been clearly  
238 demonstrated in ALS patients and animal models.



239 A case for hyperexcitability and glutamate excitotoxicity involvement in ALS pathogenesis has been  
240 more controversial. Altered intrinsic excitability has been consistently reported in both corticospinal  
241 projection neurons and spinal MNs, but these perturbations appear to fluctuate based on age/disease  
242 progression. Corticospinal projection neurons have increased firing and other signs of hyperexcitability  
243 during the first week of postnatal development (Pieri et al., 2009; Saba et al., 2016, 2019; Kim et al.,  
244 2017), but excitability is normal in young and adult pre-symptomatic ages (Kim et al., 2017; Saba et al.,  
245 2019), and may become hypoexcitable at the age of symptom onset (Saba et al., 2019). Similarly, spinal  
246 MNs show intrinsic hyperexcitability at very early (embryonic) stages (Kuo et al., 2004, 2005; Martin et  
247 al., 2013). At a postnatal age similar to the inhibitory interneurons in this study, spinal MNs do *not* have  
248 an altered threshold, rheobase or frequency-current relationship, though other abnormalities are  
249 present in PICs, action potential duration, AHP and dendritic Ca<sup>2+</sup> entry (Pambo-Pambo et al., 2009;  
250 Quinlan et al., 2011, 2015; Leroy et al., 2014). Thus, at the time point studied here, inhibitory  
251 interneurons are more disrupted in excitability than the vulnerable spinal MNs. At symptom onset, MNs  
252 may finally succumb to hypo excitability, though not all studies agree on this point (Delestrée et al.,  
253 2014; Martinez-Silva et al., 2018; Jensen et al., 2020). Notably, MNs derived from ALS patients' induced  
254 pluripotent stem cells also show initial hyperexcitability followed by hypoexcitability (Wainger et al.,  
255 2014; Devlin et al., 2015), and increasing excitability of MNs enhanced neuroprotection rather than  
256 neurodegeneration (Saxena et al., 2013). A unifying theme throughout the findings is that vulnerable  
257 MNs show excessive homeostatic gain in response to perturbation (Kuo et al., 2020), and not only  
258 excitability but other cellular properties wildly fluctuate over the lifespan of the animal (Irvin et al.,  
259 2015). In light of that, the present findings that inhibitory interneurons are less excitable should be  
260 further explored to fully characterize their contribution to neurodegenerative processes.

### 261 *Changes in neuron morphology*

262 In ALS models, altered morphology in spinal MNs occurs so early that it could be viewed as a deficit in  
263 normal development. Embryonically, SOD1 MNs have shorter projections but this is reversed during  
264 postnatal development. At 1-2 weeks of age, MNs begin to show more dendritic branching and larger  
265 soma sizes (Amendola and Durand, 2008; Filipchuk and Durand, 2012; Martin et al., 2013). Spinal MNs  
266 remain larger through adulthood (Dukkipati et al., 2018). In contrast to the spinal MNs at this age, we  
267 found that inhibitory interneurons in lamina IX were smaller and patched interneurons had expanded  
268 dendritic surface area and volume. This is reminiscent of changes in corticospinal neurons:  
269 presymptomatic corticospinal neurons also have increased arborization but with smaller soma

270 diameters (Ozdinler et al., 2011; Saba et al., 2016). In both sporadic and familial ALS patients,  
271 postmortem tissue shows degeneration of apical dendrites in corticospinal neurons and smaller soma  
272 size (Genç et al., 2017). Changes in neuronal size over the life span could greatly increase the impact of  
273 other stressors (e.g., proteostasis, metabolic deficits, intracellular transport) on vulnerable neuron  
274 populations.

#### 275 *After spike afterhyperpolarization*

276 The AHP can contribute to a neuron's firing rate such that a neuron with a large, long-lasting AHP will  
277 typically fire at a slower rate (typical of slow/type I MNs) than a neuron with small, fast-decaying AHP  
278 (typical of fast/type II MNs). In ALS patients, AHP is shortened in MNs of patients with little force deficits  
279 and later elongated in patients with large force deficits (Piotrkiewicz and Hausmanowa-Petrusewicz,  
280 2011), which could reflect early changes in physiology of vulnerable fast MNs and later, the remaining,  
281 less-vulnerable population of slow MNs. Similarly, SOD1 mouse MNs show shorter AHPs early, and  
282 longer AHPs around symptom onset (Quinlan et al., 2011; Jensen et al., 2020). Here we show that AHP is  
283 shorter in duration in SOD1 interneurons very early, however we did not find changes in any measure of  
284 the minimum or maximum firing rates in GlyT2 interneurons or RCs, so the physiological importance of  
285 this finding is not clear.

#### 286 *Inhibitory interneurons: Subtype specific effects*

287 The interneurons in this study were mostly composed of RCs, based on both our positivity rate with  
288 immunohistochemistry for CBD (65% positive) and our statistical modeling (80% RC / 20% non-RC).  
289 Interneurons located in lamina IX likely reflect a mix of RCs and Ia inhibitory interneurons. Based on  
290 highly significant results in our RC group and the prediction of higher excitability in non-RC inhibitory  
291 interneurons, further studies are warranted to examine how inhibitory interneurons may be differently  
292 modulated in a subtype-specific manner in animal models of ALS.

#### 293 *Functional implications for impaired inhibitory circuits*

294 Outward signs of improperly functioning inhibitory interneurons may be apparent from subtle changes  
295 in motor patterning and could potentially be used as a biomarker of early ALS. Locomotor disturbances  
296 have been demonstrated *in vivo* in presymptomatic SOD1 mice during walking/running (Vinsant et al.,  
297 2013a, 2013b; Akay, 2014; Quinlan et al., 2017; Allodi et al., 2020). In the embryonic and neonatal spinal  
298 cord *in vitro*, increased duration of depolarizing events in MNs and a slower period of locomotor-related  
299 bursting has been described (Medelin et al., 2016; Branchereau et al., 2019), which indicate that even  
300 during development the functioning of locomotor circuits is already impaired. In presymptomatic adult

301 mice capable of running on a treadmill, subtle locomotor differences are observed including advanced  
302 intermuscular phasing and a slower speed (Quinlan et al., 2017; Allodi et al., 2020) which indicate that  
303 before any large scale neurodegeneration occurs, there are changes in patterns of activity in MNs and  
304 interneurons that could be exploited for use as a biomarker of ALS. At initial symptom onset, the first  
305 failure of the tibialis anterior manifests as abnormality in the swing phase of the ankle (Akay, 2014).  
306 Interestingly, silencing different interneuron populations (including inhibitory interneurons and  
307 cholinergic interneurons) reveals the contribution of each population: silencing cholinergic interneurons  
308 increases locomotor deficits in SOD1 mice (Landoni et al., 2019), while silencing inhibitory interneurons  
309 has no effect suggesting these interneurons are already impaired (Allodi et al., 2020).

### 310 *Clinical-translational implications*

311 Evidence of MN hyperexcitability in ALS patients is present alongside signs of dysfunction in inhibition  
312 (Rothstein et al., 1992; Plaitakis and Constantakakis, 1993; Raynor and Shefner, 1994; Shefner and  
313 Logigian, 1998; Andreadou et al., 2008; Bae et al., 2013). Perhaps reducing excitability (with riluzole, for  
314 example) only results in a modest increase in lifespan (Bensimon et al., 1994) because it could be helpful  
315 to MNs while exacerbating inhibitory dysfunction by further depressing excitability of inhibitory  
316 interneurons like RCs. Thus, a more targeted approach to reduce MN excitability could be beneficial  
317 early in disease pathology. Stimulation of inhibitory nerves or certain protocols of transcranial  
318 stimulation could be explored, along with augmentation of inhibitory neurotransmission.

319

320 **Materials and Methods**

321 **Ethics Statement**

322 Experiments were performed in accordance with the United States National Institutes of Health Guide for  
323 Care and Use of Laboratory Animals. Approval of the Northwestern University's Animal Care and Use  
324 Committee was obtained for all experiments performed in this study. All efforts were made to minimize  
325 animal suffering and to reduce the number of animals used.

326 **Animals and Tissue harvest**

327 Transgenic B6SJL mice overexpressing the human *SOD1*<sup>G93A</sup> gene (strain 002726, Jackson Labs, Bar Harbor,  
328 ME, USA) and their wild type littermates were used (nontransgenic for the human *SOD1*<sup>G93A</sup> gene).  
329 Transgenic animals were identified using standard PCR techniques by Transnetyx (Cordova, TN, USA) and  
330 were bred with GlyT2-eGFP mice (Zeilhofer et al., 2005) generating *SOD1*<sup>G93A</sup> GlyT2-eGFP mice, here called  
331 *SOD1*. Inhibitory glycinergic interneurons express the Na<sup>+</sup> and Cl<sup>-</sup> coupled glycine transporter 2, or GlyT2.  
332 GlyT2-eGFP expression is driven by the GlyT2 promoter. Specifically, GlyT2-eGFP females were bred with  
333 *SOD1*<sup>G93A</sup> GlyT2-eGFP males, and progeny were used for experiments without knowing if they were  
334 *SOD1*<sup>G93A</sup> GlyT2-eGFP or GlyT2-eGFP. Genotyping was performed post-experimentally. For the following  
335 studies juvenile mouse pups were used between postnatal day (P) 6 - 10. Mice were deeply anesthetized  
336 with isoflurane (Henry Schein Animal Health, Dublin, OH, USA), decapitated and eviscerated. The lumbar  
337 spinal cord from L1 - L6 was removed and embedded in 2.5% w/v agar (No. A-7002, Sigma-Aldrich, St  
338 Louis, MO, USA). The agar block was then superglued with Loctite 401 (Henkel Corporation, Rocky Hill,  
339 CN, USA) to a stainless steel slicing chuck and 350  $\mu$ m transverse slices were made using the Leica 1000  
340 vibratome (Leica Microsystems, Buffalo Grove, IL, USA) as described previously (Quinlan et al., 2011).  
341 During both spinal cord isolation and slicing, the spinal cord was immersed in 1–4°C high osmolarity  
342 dissecting solution containing (mM): sucrose 234.0, KCl 2.5, CaCl<sub>2</sub> · 2H<sub>2</sub>O 0.1, MgSO<sub>4</sub> · 7H<sub>2</sub>O 4.0, HEPES  
343 15.0, glucose 11.0, and Na<sub>2</sub>PO<sub>4</sub> 1.0. The pH was adjusted to 7.35 when bubbled with 95% O<sub>2</sub>/5% CO<sub>2</sub> using  
344 1 M KOH (Fluka Analytical, Sigma-Aldrich). After cutting, the slices were incubated for >1 h at 30°C in  
345 incubating solution containing (mM): NaCl 126.0, KCl 2.5, CaCl<sub>2</sub> · 2H<sub>2</sub>O 2.0, MgCl<sub>2</sub> · 6H<sub>2</sub>O 2.0, NaHCO<sub>3</sub> 26.0,  
346 glucose 10.0, pH 7.4 when bubbled with 95% O<sub>2</sub>/5% CO<sub>2</sub> (all reagents for solutions were purchased from  
347 Sigma-Aldrich).

348 **Electrophysiology**

349 Whole cell patch clamp was performed on MNs from the lumbar segments using 2–4 M $\Omega$  glass electrodes  
350 pulled from glass capillary tubes (Item #TW150F-4, World Precision Instruments, Sarasota, FL, USA) with  
351 a Flaming-Brown P-97 (Sutter Instrument Company, Novato, CA, USA). Electrodes were positioned using

352 a Sutter Instrument MP-285 motorized micromanipulator (Sutter Instrument Company). Whole-cell patch  
353 clamp measurements were performed at room temperature using the Multiclamp700B amplifier  
354 (Molecular Devices, Burlingame, CA, USA) and Winfluor software (University of Strathclyde, Glasgow,  
355 Scotland). Briefly, slices were perfused with a modified Ringer's solution containing (in mM): 111 NaCl,  
356 3.09 KCl, 25.0 NaHCO<sub>3</sub>, 1.10 KH<sub>2</sub>PO<sub>4</sub>, 1.26 MgSO<sub>4</sub>, 2.52 CaCl<sub>2</sub>, and 11.1 glucose. The solution was  
357 oxygenated with 95% O<sub>2</sub>/5% CO<sub>2</sub> and the perfusion rate was 2.5 – 3.0 ml/min. Patch electrodes contained  
358 (in mM) 138 K-gluconate, 10 HEPES, 5 ATP-Mg, 0.3 GTP-Li and Texas Red dextran (150 μM, 3000 MW,  
359 from Invitrogen, Life Technologies, Grand Island, NY, USA). In voltage-clamp mode, fast and slow  
360 capacitance transients, as well as whole-cell capacitance, were compensated using the automatic  
361 capacitance compensation on the Multiclamp. Holding potential was set at -90 mV, and neurons were  
362 subjected to slow, depolarizing voltage ramps of 22.5 mV s<sup>-1</sup>, bringing the cell to 0 mV in 4 s, and then  
363 back to the holding potential in the following 4 s. In current clamp, neurons were subjected to depolarizing  
364 current ramps for testing I-on (the current level at firing onset), I-off (the current level at cessation of  
365 firing), and the slope of the frequency-current relationship. Negative current was often necessary to  
366 prevent action potential (AP) firing.

### 367 **Neuron Selection**

368 Glycinergic interneurons were visually selected for recording based on 1) expression of GFP, and 2)  
369 location near the MN pools. Neurons that did not repetitively fire or did not maintain a resting membrane  
370 potential below -35 mV were excluded from electrophysiological analysis. Neurons that were not clearly  
371 stained with Texas Red after patch clamp and/or could not be imaged clearly were not included in  
372 anatomical analysis.

### 373 **Electrophysiological analysis**

374 Persistent inward current (PIC) parameters were measured after subtraction of leak current. Onset was  
375 defined as the voltage at which the current began to deviate from the horizontal, leak-subtracted trace.  
376 PIC peak was the voltage at which the PIC reached peak amplitude. The linear portion of leak current  
377 (usually between -90 and -75 mV) was used to calculate whole cell input resistance. The first action  
378 potential in the train evoked by a depolarizing current ramp in current clamp mode was used to measure  
379 all parameters relating to action potentials. Threshold voltage was defined as the voltage at which the  
380 slope exceeded 10 V/s. Threshold for action potential firing was tested in two ways. The first was to use  
381 the voltage at firing onset from the current ramps up to 130 pA/s (in current clamp). The second was the  
382 voltage at which a single action potential could be evoked with a current step. Action potential overshoot

383 is the voltage past 0 mV the first spike reaches. Duration of the action potential is measured at half of  
384 action potential height (height is defined as overshoot – threshold voltage). Rates of rise and fall are  
385 defined as the peak and the trough of the first derivative of the action potential profile.

### 386 **Immunohistochemistry**

387 Immediately after electrophysiological recording, slices were fixed in (4%) paraformaldehyde for 24 h. As  
388 described by Kupferschmidt and colleagues (Kupferschmidt et al., 2015), sections were then incubated  
389 in sodium borohydride (NaBH<sub>4</sub>; 5mg/mL in diH<sub>2</sub>O) to quench aldehyde-induced catecholamine  
390 fluorescence and reduce free aldehyde groups, followed by Sudan Black B solution (0.2% in 70%  
391 ethanol). Slices were washed twice for 30 min in room temperature PBS to extinguish the  
392 immunohistochemistry reaction. Slices were blocked using 2% normal horse serum in PBST (0.2% Triton-  
393 X100 in PBS) for 4 h, and incubated in PBST with rabbit anti-Texas Red antibody (polyclonal IgG, 1:2000,  
394 ThermoFisher Scientific®, A-6399); mouse anti-Calbindin-D-28K (monoclonal; 1:3000, Sigma, C9848) for  
395 72 h at 4°C. Following four washes in PBST over a total of 16–24 h, slices were incubated in the  
396 appropriate fluorescent dye-conjugated secondary antibodies (goat anti-rabbit IgG, Texas Red-  
397 conjugated, and goat anti-mouse IgG, Cyanine5-conjugated, both ThermoFisher Scientific®, 1:500, T-  
398 6391, and 1:500, A10524, respectively) for 48 h. Then they were washed again in 0.1M PBS and DAPI  
399 treated for 5 min, washed and covered using Fluoromount® and glass coverslips.

### 400 **Morphological analysis**

401 Neuron morphology was assessed from two types of images: 1) 2 photon image stacks of live neurons  
402 taken immediately after obtaining electrophysiological parameters, and 2) confocal image stacks taken  
403 after fixation and tissue processing. Images collected using these two methods were analyzed  
404 separately. Measurements from 2-photon images included measurements from both soma and  
405 dendrites (soma volume, maximum soma cross-sectional area, soma perimeter in the largest plane,  
406 soma surface area, number of primary dendrites, and average dendrite length, dendrite surface area  
407 and dendrite volume). Measurements from confocal images only included soma measurements.  
408 *Two photon imaging:* An Olympus BX-51WIF microscope fitted with an Olympus 40x/0.8NA water-  
409 dipping objective lens was used. Two-photon excitation fluorescence microscopy was performed with a  
410 galvanometer-based Coherent Chameleon Ultra II laser (Coherent, Santa Clara, CA, USA) tuned to 900  
411 nm. A red Bio-Rad 2100MPD photomultiplier tube (Bio-Rad, Hercules, CA, USA) (570 – 650 nm) was used  
412 to collect emission in the red channel. Z-stacks were obtained for each interneuron at 1024 x 1024 pixels  
413 (308 x 308 μm) resolution and roughly 100 μm in depth (step size 1 μm). From these Z-stacks, Texas

414 Red<sup>®</sup> -filled neurons were three-dimensionally reconstructed using NeuroLucida software (MBF  
415 Bioscience, Williston, VT, USA).

416 *Confocal imaging:* Sections were observed with a confocal laser microscope (LSM510, Zeiss,  
417 Oberkochen, Darmstadt, Germany) with argon (488 nm) and helium-neon (543 nm) lasers and a 20X  
418 objective. Each confocal image obtained in triple staining experiments was split into three channels. Co-  
419 localization analysis of CBD, Texas Red and GlyT2 positive cells included visual inspection of labeling,  
420 size, and shape of the cell through the stack. From these Z-stacks, GlyT2 positive interneurons were  
421 three-dimensionally reconstructed using NeuroLucida software (MBF Bioscience, Williston, VT, USA).  
422 CBD positive cells were counted using ImageJ (National Institutes of Health, Bethesda, MD).

### 423 **Statistical analysis**

424 The assumptions of homogeneity of variances and the normality of the distribution of values for each  
425 measured characteristic were evaluated with Levene's and Shapiro-Wilk tests, respectively. Group  
426 comparisons (WT vs SOD1) were performed using ANOVA on characteristics that satisfied both  
427 conditions and using the Kruskal-Wallis test for the rest of the characteristics. Results are presented as  
428 means  $\pm$  SEM. Significance level was set at  $p \leq 0.05$ .

### 429 *Statistical modeling: Random Forest and Principal Component Analysis*

430 As it was not possible to confirm or rule out RC identity in the majority of our neurons using  
431 immunohistochemistry, we created statistical models based on those we had tested to predict RC  
432 identity among remaining untested neurons. To do this, we employed a random forest method of  
433 statistical learning that generates a large number of decision trees, each constructed using a different,  
434 randomly selected (with replacement) subset of the training data set. Thus, all variables in the dataset  
435 were first split into 8 subgroups of related variables. Groups included membrane properties, action  
436 potential measurements, PIC properties, firing frequency measurements, AHP parameters,  $I_H$   
437 characteristics, soma measurements and dendritic properties. For example, all variables pertaining to  
438 PIC characteristics (PIC onset, peak voltage, PIC amplitude and normalized amplitude) were grouped.  
439 Next, a random forest model (Breiman, 2001) was created for each subgroup of variables varying the  
440 number of measurements to include in each tree. This method determined the number of variables that  
441 yielded the most accurate model. The reason this was performed (instead of including all measured  
442 parameters) is that models with larger numbers of variables tend to overfit the training dataset and fail  
443 to classify accurately unseen/test cases. Therefore, it was essential to distill down our parameters to  
444 only include the most important variables for classifying neurons as RC or non-RC. The decision trees are

445 then used to classify an observation by selecting the most common label among multiple trees. Random  
446 forest allows varying two parameters: the number of variables to consider when building each tree and  
447 the number of generated trees. One can choose a set of these two parameters that yields the most  
448 optimal model. The random forest model with the lowest error was then used to evaluate the most  
449 important variables in each subgroup for distinguishing between RCs and non-RCs. Here we used Mean  
450 Decrease in Accuracy Index to evaluate the importance of the various measured characteristics of the  
451 neurons in predicting RCs vs non-RCs. After the important variables in each subgroup were identified, a  
452 dataset was created with only these variables and the above process was repeated using these  
453 important variables. Model accuracy was evaluated by using a leave-one-out cross validation (LOOCV).  
454 The accuracy for the best random forest model created from the previously determined important  
455 variables was 79%. The best random forest model was then used to predict the RC/non-RC classification  
456 for untested cells in the dataset. Once the RC/non-RC classification was determined, normality and  
457 homogeneity tests were run on each group followed by ANOVA and Kruskal Wallis in order to determine  
458 group differences between WT RCs and SOD1 RCs as well as between WT non-RCs and SOD1 non-RCs.  
459 Principal components analysis (PCA) (Hotelling, 1933) of each previously created subgroup of variables  
460 was also evaluated for predictive value. The scores from the first two principal components in each  
461 subgroup were used in a logistic regression model to predict the known CBD-tested cells. Using PCA, the  
462 most important variables were identified as the same as those identified by the random forest method.  
463 The model accuracy was also tested using LOOCV. The best PCA model accuracy was 70%, therefore,  
464 the random forest model (with 79% accuracy based on LOOCV) was selected to predict classification of  
465 the remaining untested neurons rather than this method.

466

#### 467 **Acknowledgments**

468 This project was funded by a springboard fellowship from Target ALS to KAQ and a University of Rhode  
469 Island Graduate School Tuition Scholarship to LMM. The authors thank Drs Emily Reedich and Claudia  
470 Fallini for comments on the initial draft of the manuscript.

471



472 **References**

- 473 Akay T (2014) Long-term measurement of muscle denervation and locomotor behavior in individual  
474 wild-type and ALS model mice. *J Neurophysiol* 111:694–703.
- 475 Allodi I, Montañana-Rosell R, Selvan R, Löw P, Kiehn O (2020) Locomotor deficits in ALS mice are  
476 paralleled by loss of V1-interneuron-connections onto fast motor neurons. *bioRxiv:2020.06.23.166389*  
477 Available at: <http://biorxiv.org/content/early/2020/06/23/2020.06.23.166389.abstract>.
- 478 Amendola J, Durand J (2008) Morphological differences between wild-type and transgenic superoxide  
479 dismutase 1 lumbar motoneurons in postnatal mice. *J Comp Neurol* 511:329–341.
- 480 Andreadou E, Kapaki E, Kokotis P, Paraskevas GP, Katsaros N, Libitaki G, Petropoulou O, Zis V, Sfagos C,  
481 Vassilopoulos D (2008) Plasma glutamate and glycine levels in patients with amyotrophic lateral  
482 sclerosis. *In Vivo (Brooklyn)* 22:137–142.
- 483 Avossa D, Grandolfo M, Mazzarol F, Zatta M, Ballerini L (2006) Early signs of motoneuron vulnerability in  
484 a disease model system: Characterization of transverse slice cultures of spinal cord isolated from  
485 embryonic ALS mice. *Neuroscience* 138:1179–1194.
- 486 Bae JS, Simon NG, Menon P, Vucic S, Kiernan C, Doyle AC, Case-book T, Holmes S (2013) The Puzzling  
487 Case of Hyperexcitability in Amyotrophic Lateral Sclerosis What Really is Hyperexcitability in ALS ? How  
488 Can We Objectively Assess. *J Clin Neurol* 9:65–74.
- 489 Bensimon G, Lacomblez L, Meininger V (1994) A Controlled Trial of Riluzole in Amyotrophic Lateral  
490 Sclerosis. *N Engl J Med* 330:585–591.
- 491 Branchereau P, Martin E, Supiot L, Hodeib F, Laupénie A, Dalvi U, Zhu H, Cazenave W, Cattaert D (2019)  
492 Relaxation of synaptic inhibitory events as a compensatory mechanism in fetal SOD spinal motor  
493 networks. *Elife* 8:1–28.
- 494 Breiman L (2001) Random forests. *Mach Learn* 45:5–32.
- 495 Casas C, Herrando-Grabulosa M, Manzano R, Mancuso R, Osta R, Navarro X (2013) Early presymptomatic  
496 cholinergic dysfunction in a murine model of amyotrophic lateral sclerosis. *Brain Behav* 3:145–158.
- 497 Chang Q, Martin LJ (2009a) Glycinergic Innervation of Motoneurons Is Deficient in Amyotrophic Lateral  
498 Sclerosis Mice A Quantitative Confocal Analysis. *Am J Pathol* 174:574–585.
- 499 Chang Q, Martin LJ (2009b) Glycinergic innervation of motoneurons is deficient in amyotrophic lateral  
500 sclerosis mice: A quantitative confocal analysis. *Am J Pathol* 174:574–585.
- 501 Clark RM, Blizzard CA, Young KM, King AE, Dickson TC (2017) Calretinin and Neuropeptide  $\gamma$  interneurons  
502 are differentially altered in the motor cortex of the SOD1 G93A mouse model of ALS. *Sci Rep* 7:1–13

503 Available at: <http://dx.doi.org/10.1038/srep44461>.

504 Clark RM, Brizuela M, Blizzard CA, Dickson TC (2018) Reduced excitability and increased neurite  
505 complexity of cortical interneurons in a familial mouse model of amyotrophic lateral sclerosis. *Front Cell*  
506 *Neurosci* 12:1–7.

507 Delestrée N, Manuel M, Iglesias C, Elbasiouny SM, Heckman CJ, Zytnicki D (2014) Adult spinal  
508 motoneurons are not hyperexcitable in a mouse model of inherited amyotrophic lateral sclerosis. *J*  
509 *Physiol* 592:1687–1703.

510 Devlin AC, Burr K, Borooh S, Foster JD, Cleary EM, Geti I, Vallier L, Shaw CE, Chandran S, Miles GB  
511 (2015) Human iPSC-derived motoneurons harbouring TARDBP or C9ORF72 ALS mutations are  
512 dysfunctional despite maintaining viability. *Nat Commun* 6:1–12 Available at:  
513 <http://dx.doi.org/10.1038/ncomms6999>.

514 Dukkupati SS, Chihi A, Wang Y, Elbasiouny SM (2016) Experimental Design and Data Analysis Issues  
515 Contribute to Inconsistent Results of C-Bouton Changes in Amyotrophic Lateral Sclerosis. *eNeuro* 4:1–  
516 13.

517 Dukkupati SS, Garrett TL, Elbasiouny SM (2018) The vulnerability of spinal motoneurons and soma size  
518 plasticity in a mouse model of amyotrophic lateral sclerosis. *J Physiol* 596:1723–1745.

519 Filipchuk AA, Durand J (2012) Postnatal dendritic development in lumbar motoneurons in mutant  
520 superoxide dismutase 1 mouse model of amyotrophic lateral sclerosis. *Neuroscience* 209:144–154  
521 Available at: <http://dx.doi.org/10.1016/j.neuroscience.2012.01.046>.

522 Genç B, Jara JH, Lagrimas AKB, Pytel P, Roos RP, Mesulam MM, Geula C, Bigio EH, Özdinler PH (2017)  
523 Apical dendrite degeneration, a novel cellular pathology for Betz cells in ALS. *Sci Rep* 7:1–10 Available at:  
524 <http://dx.doi.org/10.1038/srep41765>.

525 Gunes ZI, Kan VWY, Ye XQ, Liebscher S (2020) Exciting Complexity: The Role of Motor Circuit Elements in  
526 ALS Pathophysiology. *Front Neurosci* 14:1–30.

527 Hayashi H, Suga M, Satake M, Tsubaki T (1981) Reduced glycine receptor in the spinal cord in  
528 amyotrophic lateral sclerosis. *Ann Neurol* 9:292–294.

529 Hegedus J, Putman CT, Gordon T (2007) Time course of preferential motor unit loss in the SOD1G93A  
530 mouse model of amyotrophic lateral sclerosis. *Neurobiol Dis* 28:154–164.

531 Herron LR, Miles GB (2012) GENDER-SPECIFIC PERTURBATIONS IN MODULATORY INPUTS TO  
532 MOTONEURONS IN A MOUSE MODEL OF AMYOTROPHIC LATERAL SCLEROSIS. *Neuroscience* 226:313–  
533 323 Available at: <http://dx.doi.org/10.1016/j.neuroscience.2012.09.031>.

534 Hossaini M, Cano SC, Van Dis V, Haasdijk ED, Hoogenraad CC, Holstege JC, Jaarsma D (2011) Spinal  
535 inhibitory interneuron pathology follows motor neuron degeneration independent of glial mutant  
536 superoxide dismutase 1 expression in SOD1-ALS mice. *J Neuropathol Exp Neurol* 70:662–677.

537 Hotelling H (1933) Analysis of a complex of statistical variables into Principal Components. *J Educ*  
538 *Psychol* 24:417–441.

539 Howells J, Sangari S, Matamala JM, Kiernan MC, Marchand-Pauvert V, Burke D (2020) Interrogating  
540 interneurone function using threshold tracking of the H reflex in healthy subjects and patients with  
541 motor neurone disease. *Clin Neurophysiol*.

542 Irvin CW, Kim RB, Mitchell CS (2015) Seeking homeostasis: Temporal trends in respiration, oxidation, and  
543 calcium in SOD1 G93A amyotrophic lateral sclerosis mice. *Front Cell Neurosci* 9:1–11.

544 Jensen DB, Kadlecova M, Allodi I, Meehan CF (2020) Spinal motoneurons are intrinsically more  
545 responsive in the adult G93A SOD1 mouse model of Amyotrophic Lateral Sclerosis. *J Physiol*.

546 Kim J, Hughes EG, Shetty AS, Arlotta P, Goff LA, Bergles DE, Brown SP (2017) Changes in the Excitability  
547 of Neocortical Neurons in a Mouse Model of Amyotrophic Lateral Sclerosis Are Not Specific to  
548 Corticospinal Neurons and Are Modulated by Advancing Disease. *J Neurosci* 37:9037–9053 Available at:  
549 <http://www.jneurosci.org/lookup/doi/10.1523/JNEUROSCI.0811-17.2017>.

550 Kuo JJ, Schonewille M, Siddique T, Schults AN, Fu R, Bar PR, Anelli R, Heckman C, Kroese AB (2004)  
551 Hyperexcitability of Cultured Spinal Motoneurons From Presymptomatic ALS Mice. *J Neurophysiol*  
552 91:571–575 Available at: <http://jn.physiology.org/cgi/doi/10.1152/jn.00665.2003>.

553 Kuo JJ, Siddique T, Fu R, Heckman CJ (2005) Increased persistent Na<sup>+</sup> current and its effect on  
554 excitability in motoneurons cultured from mutant SOD1 mice. *J Physiol* 563:843–854.

555 Kuo SW, Binder MD, Heckman CJ (2020) Excessive Homeostatic Gain in Spinal Motoneurons in a Mouse  
556 Model of Amyotrophic Lateral Sclerosis. *Sci Rep* 10.

557 Kupferschmidt DA, Cody PA, Lovinger DM, Davis MI (2015) Brain BLAQ: Post-hoc thick-section  
558 histochemistry for localizing optogenetic constructs in neurons and their distal terminals. *Front*  
559 *Neuroanat* 9:1–9.

560 Landoni LM, Myles JR, Wells TL, Mayer WP, Akay T (2019) Cholinergic modulation of motor neurons  
561 through the C-boutons are necessary for the locomotor compensation for severe motor neuron loss  
562 during amyotrophic lateral sclerosis disease progression. *Behav Brain Res* 369.

563 Leroy F, Lamotte d’Incamps B, Imhoff-Manuel RD, Zytnicki D (2014) Early intrinsic hyperexcitability does  
564 not contribute to motoneuron degeneration in amyotrophic lateral sclerosis. *Elife* 3:1–25.

565 Malessa S, Leigh PN, Bertel O, Sluga E, Hornykiewicz O (1991) Amyotrophic lateral sclerosis: glutamate  
566 dehydrogenase and transmitter amino acids in the spinal cord. *J Neurol Neurosurg Psychiatry* 54:984–  
567 988.

568 Martin E, Cazenave W, Cattaert D, Branchereau P (2013) Embryonic alteration of motoneuronal  
569 morphology induces hyperexcitability in the mouse model of amyotrophic lateral sclerosis. *Neurobiol Dis*  
570 54:116–126.

571 Martin LJ, Liu Z, Chen K, Price AC, Pan Y, Swaby JA, Golden WC (2007) Motor Neuron Degeneration in  
572 Amyotrophic Lateral Sclerosis Mutant Superoxide Dismutase-1 Transgenic Mice: Mechanisms of  
573 Mitochondriopathy and Cell Death. *J Comp Neurol* 500:20–46.

574 Martinez-Silva M de L, Imhoff-Manuel RD, Sharma A, Heckman C, Shneider NA, Roselli F, Zytnicki D,  
575 Manuel M (2018) Hypoexcitability precedes denervation in the large fast-contracting motor units in two  
576 unrelated mouse models of ALS. *Elife* 7:1–26.

577 McGown A, McDearmid JR, Panagiotaki N, Tong H, Al Mashhadi S, Redhead N, Lyon AN, Beattie CE, Shaw  
578 PJ, Ramesh TM (2013) Early interneuron dysfunction in ALS: Insights from a mutant sod1 zebrafish  
579 model. *Ann Neurol* 73:246–258.

580 Medelin M, Rancic V, Cellot G, Laishram J, Veeraraghavan P, Rossi C, Muzio L, Sivilotti L, Ballerini L (2016)  
581 Altered development in GABA co-release shapes glycinergic synaptic currents in cultured spinal slices of  
582 the SOD1G93A mouse model of amyotrophic lateral sclerosis. *J Physiol* 594:3827–3840.

583 Milan L, Courtand G, Cardoit L, Masméjean F, Barrière G, Cazalets JR, Garret M, Bertrand SS (2015) Age-  
584 related changes in pre- and postsynaptic partners of the cholinergic C-boutons in wild-type and  
585 SOD1G93A lumbar motoneurons. *PLoS One* 10:1–21.

586 Niebroj-Dobosz I, Janik P (1999) Amino acids acting as transmitters in amyotrophic lateral sclerosis (ALS).  
587 *Acta Neurol Scand* 100:6–11.

588 Ozdinler PH, Benn S, Yamamoto TH, Guzel M, Brown RH, Macklis JD (2011) Corticospinal Motor Neurons  
589 and Related Subcerebral Projection Neurons Undergo Early and Specific Neurodegeneration in  
590 hSOD1G93A Transgenic ALS Mice. *J Neurosci* 31:4166–4177 Available at:  
591 <http://www.jneurosci.org/cgi/doi/10.1523/JNEUROSCI.4184-10.2011>.

592 Pambo-Pambo A, Durand J, Gueritaud J-P (2009) Early excitability changes in lumbar motoneurons of  
593 transgenic SOD1G85R and SOD1G(93A-Low) mice. *J Neurophysiol* 102:3627–3642 Available at:  
594 <http://www.ncbi.nlm.nih.gov/pubmed/19828728>.

595 Pieri M, Carunchio I, Curcio L, Mercuri NB, Zona C (2009) Increased persistent sodium current

596 determines cortical hyperexcitability in a genetic model of amyotrophic lateral sclerosis. *Exp Neurol*  
597 215:368–379 Available at: <http://dx.doi.org/10.1016/j.expneurol.2008.11.002>.

598 Piotrkiewicz M, Hausmanowa-Petrusewicz I (2011) Motoneuron afterhyperpolarisation duration in  
599 amyotrophic lateral sclerosis. *J Physiol* 589:2745–2754.

600 Plaitakis A, Constantakakis E (1993) Altered metabolism of excitatory amino acids, N-acetyl-aspartate  
601 and N-acetyl-aspartylglutamate in amyotrophic lateral sclerosis. *Brain Res Bull* 30:381–386.

602 Pullen AH, Athanasiou D (2009) Increase in presynaptic territory of C-terminals on lumbar motoneurons  
603 of G93A SOD1 mice during disease progression. *Eur J Neurosci* 29:551–561.

604 Pun S, Santos AF, Saxena S, Xu L, Caroni P (2006) Selective vulnerability and pruning of phasic  
605 motoneuron axons in motoneuron disease alleviated by CNTF. *Nat Neurosci* 9:408–419.

606 Quinlan KA, Kajtaz E, Ciolino JD, Imhoff-Manuel RD, Tresch MC, Heckman CJ, Tysseling VM (2017)  
607 Chronic electromyograms in treadmill running SOD1 mice reveal early changes in muscle activation. *J*  
608 *Physiol* 595:5387–5400.

609 Quinlan KA, Lamano JB, Samuels J, Heckman CJ (2015) Comparison of dendritic calcium transients in  
610 juvenile wild type and SOD1G93A mouse lumbar motoneurons. *Front Cell Neurosci* 9:1–13 Available at:  
611 <http://journal.frontiersin.org/article/10.3389/fncel.2015.00139/abstract>.

612 Quinlan KA, Schuster JE, Fu R, Siddique T, Heckman CJ (2011) Altered postnatal maturation of electrical  
613 properties in spinal motoneurons in a mouse model of amyotrophic lateral sclerosis. *J Physiol* 589:2245–  
614 2260 Available at: <http://doi.wiley.com/10.1113/jphysiol.2010.200659>.

615 Raynor EM, Shefner JM (1994) Recurrent inhibition is decreased in patients with amyotrophic lateral  
616 sclerosis. *Neurology* 44:2148–2153.

617 Rothstein JD, Martin LJ, Kuncl RW (1992) Decreased Glutamate Transport by the Brain and Spinal Cord in  
618 Amyotrophic Lateral Sclerosis. *N Engl J Med* 326:1464–1468.

619 Saba L, Viscomi MT, Caioli S, Pignataro A, Bisicchia E, Pieri M, Molinari M, Ammassari-Teule M, Zona C  
620 (2016) Altered Functionality, Morphology, and Vesicular Glutamate Transporter Expression of Cortical  
621 Motor Neurons from a Presymptomatic Mouse Model of Amyotrophic Lateral Sclerosis. *Cereb Cortex*  
622 26:1512–1528.

623 Saba L, Viscomi MT, Martini A, Caioli S, Mercuri NB, Guatteo E, Zona C (2019) Modified age-dependent  
624 expression of NaV1.6 in an ALS model correlates with motor cortex excitability alterations. *Neurobiol Dis*  
625 130:104532 Available at: <https://doi.org/10.1016/j.nbd.2019.104532>.

626 Sangari S, Iglesias C, El Mendili MM, Benali H, Pradat PF, Marchand-Pauvert V (2016) Impairment of

627 sensory-motor integration at spinal level in amyotrophic lateral sclerosis. *Clin Neurophysiol* 127:1968–  
628 1977.

629 Saxena S, Roselli F, Singh K, Leptien K, Julien JP, Gros-Louis F, Caroni P (2013) Neuroprotection through  
630 Excitability and mTOR Required in ALS Motoneurons to Delay Disease and Extend Survival. *Neuron*  
631 80:80–96 Available at: <http://dx.doi.org/10.1016/j.neuron.2013.07.027>.

632 Shefner JM, Logigian EL (1998) The mixed nerve silent period in normal subjects and patients with  
633 amyotrophic lateral sclerosis. *Electromyogr Clin Neurophysiol* 38:505–510.

634 Vinsant S, Mansfield C, Jimenez-Moreno R, Moore VDG, Yoshikawa M, Hampton TG, Prevet D, Caress  
635 J, Oppenheim RW, Milligan C (2013a) Characterization of early pathogenesis in the SOD1G93A mouse  
636 model of ALS: Part II, results and discussion. *Brain Behav* 3:431–457.

637 Vinsant S, Mansfield C, Jimenez-Moreno R, Moore VDG, Yoshikawa M, Hampton TG, Prevet D, Caress  
638 J, Oppenheim RW, Milligan C (2013b) Characterization of early pathogenesis in the SOD1G93A mouse  
639 model of ALS: Part I, background and methods. *Brain Behav* 3:335–350.

640 Wainger BJ, Kiskinis E, Mellin C, Wiskow O, Han SSW, Sandoe J, Perez NP, Williams LA, Lee S, Boulting G,  
641 Berry JD, Brown RH, Cudkowicz ME, Bean BP, Eggan K, Woolf CJ (2014) Intrinsic membrane  
642 hyperexcitability of amyotrophic lateral sclerosis patient-derived motor neurons. *Cell Rep* 7:1–11  
643 Available at: <http://dx.doi.org/10.1016/j.celrep.2014.03.019>.

644 Whitehouse PJ, Wamsley JK, Zarbin MA, Price DL, Tourtellotte WW, Kuhar MJ (1983) Amyotrophic  
645 lateral sclerosis: Alterations in neurotransmitter receptors. *Ann Neurol* 14:8–16.

646 Wootz H, Fitzsimons-Kantamneni E, Larhammar M, Rotterman TM, Enjin A, Patra K, André E, Van  
647 Zundert B, Kullander K, Alvarez FJ (2013) Alterations in the motor neuron-renshaw cell circuit in the  
648 Sod1G93A mouse model. *J Comp Neurol* 521:1449–1469.

649 Zeilhofer HU, Studler B, Arabadzisz D, Schweizer C, Ahmadi S, Layh B, Bösl MR, Fritschy JM (2005)  
650 Glycinergic neurons expressing enhanced green fluorescent protein in bacterial artificial chromosome  
651 transgenic mice. *J Comp Neurol* 482:123–141.

652

653
